# Supplementary material for: Selective production of acetonitrile via dehydroamination of ethanol over a stable Cu–Zr/meso SiO2 catalyst
Source: Royal Society of Chemistry journal article supplement (doi:10.1039/d5gc01047k), 2025-01-01
Supplement: d5gc01047k1.pdf [file d5gc01047k1.pdf]

## Supplementary Information

### Selective production of acetonitrile by dehydroamination of ethanol over a stable Cu-Zr/meso SiO<sub>2</sub> catalyst

Xiaomin Zhang<sup>a,b</sup>, Mo Zhou<sup>b</sup>, Yujia Zhao<sup>b</sup>, Jifeng Pang<sup>b</sup>, Pengfei Wu<sup>b,\*</sup>, Zhen Guo<sup>c,d,\*</sup> and Mingyuan Zheng<sup>b,\*</sup>

<sup>a</sup> School of Transportation Engineering, Dalian Jiaotong University, Dalian 116028, China

<sup>b</sup> CAS Key Laboratory of Science and Technology on Applied Catalysis, Dalian Institute of Chemical Physics, Chinese Academy of Sciences, Dalian 116023, China

<sup>c</sup> School of Materials Science and Engineering, Dalian Jiaotong University, Dalian 116028, China

<sup>d</sup> Key Laboratory of Agricultural Resource Chemistry and Biotechnology, Yulin 537000, China

## Chemical reagents

ZrO(NO<sub>3</sub>)<sub>2</sub> (99.5 wt%), urea (99 wt%), Al<sub>2</sub>O<sub>3</sub> (99.9 wt%), TiO<sub>2</sub> (99.8 wt%), ZrO<sub>2</sub> (99 wt%), silica sol (40 wt%), nano SiO<sub>2</sub> (99.5 wt%), ammonium carbonate (99 wt%), tetraethyl orthosilicate (TEOS, 98 wt%), nitric acid (65-68 wt%), 1-butanol (99 wt%), 1-pentanol (99 wt%), 1-hexanol (99 wt%), 1-heptanol (98 wt%), 1-octanol (99 wt%), isobutanol (99 wt%), benzyl alcohol (99 wt%), acetonitrile (99 wt%), butyronitrile (99 wt%), pentanonitrile (97 wt%), hexanenitrile (97 wt%), heptanonitrile (98 wt%), octanenitrile (97 wt%), isobutylironitrile (99 wt%), benzonitrile (99 wt%), 2-methylpyridine (98 wt%), 4-methylpyridine (98 wt%), diethylamine (99.5 wt%) and triethylamine (99.5 wt%) were purchased from Shanghai Aladdin Biochemical Technology Co., Ltd. Cu(NO<sub>3</sub>)<sub>2</sub>·3H<sub>2</sub>O (99 wt%) and ethanol (99.7 wt%) were purchased from Sinopharm Chemical Reagent Co, Ltd. MFI was purchased from Tianjin Nanhua Catalyst Co., Ltd. Mn(NO<sub>3</sub>)<sub>2</sub>·6H<sub>2</sub>O (98 wt%), Cr(NO<sub>3</sub>)<sub>2</sub>·9H<sub>2</sub>O (99 wt%), Fe(NO<sub>3</sub>)<sub>2</sub>·9H<sub>2</sub>O (98.5 wt%), Ni(NO<sub>3</sub>)<sub>2</sub>·6H<sub>2</sub>O (98 wt%), Ce(NO<sub>3</sub>)<sub>3</sub>·6H<sub>2</sub>O (99.5 wt%), Ga(NO<sub>3</sub>)<sub>2</sub> (99.9 wt%), In(NO<sub>3</sub>)<sub>3</sub> (99.9 wt%), La(NO<sub>3</sub>)<sub>3</sub>·6H<sub>2</sub>O (99 wt%), LiNO<sub>3</sub> (99 wt%), Co(NO<sub>3</sub>)<sub>2</sub>·6H<sub>2</sub>O (98.5 wt%), Gd(NO<sub>3</sub>)<sub>2</sub>·4H<sub>2</sub>O (99 wt%) and Sc(NO<sub>3</sub>)<sub>3</sub>·6H<sub>2</sub>O (99 wt%) were purchased from Shanghai Macklin Biochemical Co., Ltd. Meso SiO<sub>2</sub> (99.5 wt%, S<sub>BET</sub> ≥ 400 m<sup>2</sup>/g) was purchased from Qingdao Haiwan Specialty Chemicals Co., Ltd.

## Characterization

Powder X-ray diffraction (XRD) patterns were recorded on a PANalytical X'Pert-Pro X-ray diffractometer with a Cu K $\alpha$  radiation ( $\lambda$  = 0.154059 nm) operating at 40 kV and 40 mA. The chemical composition of the samples was determined using a Philips Magix-601 X-ray fluorescence (XRF) spectrometer. The metal loading of spent catalysts was determined by inductively coupled plasma optical emission spectroscopy (ICP-OES) on a Thermo iCAP6300 instrument. Before analysis, the catalyst was dissolved in aqua regia (3 mL HCl and 1 mL HNO<sub>3</sub>), and then diluted into 1-10 ppm according to the theoretical amount of metals. High-angle annular dark field scanning transmission electron microscopy (HAADF-STEM) images and energy dispersive X-ray spectra (EDX) elemental mapping of samples were obtained by using a JEOL JEM-2100F microscope, operated at 200 kV. Temperature-programmed reduction (H<sub>2</sub>-TPR) was carried out on a Micromeritics AutoChem II 2920 instrument equipped with a thermal conductivity detector (TCD). About 100 mg of calcined catalyst was loaded into a quartz tube and dried in argon stream at 150 °C for 1 h to remove the adsorbed water. After being returned to 50 °C, the catalyst was heated in a 10 % H<sub>2</sub>-Ar flow at a heating rate of 10 °C/min up to 500 °C. The copper dispersion and the surface area of metallic copper of catalysts were determined by the N<sub>2</sub>O chemisorption method. The catalyst was first reduced in the procedure described in the TPR experiment in 10% H<sub>2</sub>/Ar until 350 °C. The amount of hydrogen consumption in the first TPR was denoted as A<sub>1</sub>. Then, the reactor was purged with Ar at 50 °C and a flow of 10% N<sub>2</sub>O/Ar was used to oxidize surface copper atoms to Cu<sub>2</sub>O at 50 °C for 1 h. After flushing with Ar to remove the oxidant, another TPR experiment was performed in 10% H<sub>2</sub>/Ar until 350 °C. Hydrogen consumption in the second TPR was denoted as A<sub>2</sub>. The dispersion (D<sub>Cu</sub>) of surface Cu were calculated by the following equation (Equation 1):

$$D_{Cu} = \frac{2A_2}{A_1} \times 100\% \quad (\text{Equation 1})$$

Specific area of metallic copper ( $S_{Cu}$ ) and Cu particle size ( $d_{Cu}$ ) were calculated according to following equations (Equations 2-3):<sup>1, 2</sup>

$$S_{Cu} = \frac{2A_2 \times N_{av}}{A_1 \times M_{Cu} \times 1.46 \times 10^{19}} \quad (\text{m}^2_{Cu}/\text{g}_{Cu}) \quad (\text{Equation 2})$$

$$d_{Cu} = \frac{6000}{S_{Cu} \times \rho_{Cu}} \quad (\text{nm}) \quad (\text{Equation 3})$$

$\rho_{Cu}$  is the density of copper (8.92 g/cm<sup>3</sup>),  $N_{av}$  is Avogadro's constant ( $6.02 \times 10^{23}$ /mol),  $M_{Cu}$  is the relative atomic mass of copper (63.46 g/mol), and  $1.46 \times 10^{19}$  is the number of copper atom of per square meter.

Ex-situ X-ray photoelectron spectra (XPS) were recorded on a Thermo Scientific K-Alpha+ spectrometer with a monochromatic Al-K $\alpha$  X-ray source as the excitation source. Prior to the test, the calcined sample was firstly compressed into a thin disk and reduced in a 10 % H<sub>2</sub>-Ar flow of 50 mL/min at 300 °C for 4 h and cooled naturally. Then, the pre-reduced sample was passivated in a 1 % O<sub>2</sub>-Ar flow of 20 mL/min for 8 h. Afterwards, the sample was carefully transferred into the XPS measurement chamber under high vacuum condition ( $P < 10^{-9}$  Pa). Energy corrections were performed using a 1s peak of the polluted carbon at 284.6 eV. Nitrogen adsorption isotherms were measured at -196 °C on a Micromeritics ASAP 2460 system. Before the measurements, all samples were pretreated in vacuum at 300 °C for 8 h. The total surface area was calculated based on the Brunauer–Emmett–Teller (BET) equation. The micropore volume was evaluated using the  $t$ -plot method. The mesopore volume was evaluated from the adsorption isotherm by the Barrett–Joyner–Halenda (BJH) method. NH<sub>3</sub> temperature-programmed desorption (NH<sub>3</sub>-TPD) was performed on Micromeritics Autochem II apparatus equipped with a mass spectrometer (MS) detector. Typically, 100 mg of sample was pretreated at 300 °C for 60 min in He flow of 30 mL/min. After cooling down to 50 °C, NH<sub>3</sub> was dosed onto the sample until its saturated adsorption. Then the sample was purged with He flow for 30 min to remove the physically absorbed NH<sub>3</sub>. Finally, the sample was heated to 800 °C at a rate of 10 °C/min, and the NH<sub>3</sub> desorbed from the surface and was monitored by the MS detector. Fourier transform infrared (FTIR) spectra were collected on a Bruker Tensor 27 instrument. For the adsorption measurements, 20 mg catalyst was pressed into a self-supporting disc and mounted on the sample holder. The catalysts were activated under vacuum ( $p = 10^{-6}$  mbar) at 350 °C for 1 h. As soon as the catalyst cooled to 150 °C, a spectrum of the activated catalyst was taken as the background. Subsequently, adsorption of pyridine was performed at 0.1 mbar for 30 min until saturation/equilibration of the surface was reached and the peak area of the IR signal remained

constant. After physisorbed pyridine was removed by evacuation ( $p = 10^{-6}$  mbar) at 150 °C, another spectrum was recorded. Finally, spectra were taken after desorption at 150 °C, 250 °C, and 350 °C for 30 min, respectively, and then the FTIR spectra were collected at ambient temperature. The acid sites quantity was calculated by following equations (Equations 4-5):<sup>3</sup>

$$C_{\text{pyridine on Brönsted sites}} = \frac{1.88 \times \text{IA(B)} \times R^2}{W} \quad (\text{Equation 4})$$

$$C_{\text{pyridine on Lewis sites}} = \frac{1.42 \times \text{IA(L)} \times R^2}{W} \quad (\text{Equation 5})$$

C is the acid sites density (mmol/g), IA (B or L) is the integrated absorbance of B or L bands ( $\text{cm}^{-1}$ ), R is the radius of catalyst sample disk (cm), W is the weight of catalyst sample disk (mg).

The adsorption and desorption isotherms of ethanol and acetonitrile were determined using an Intelligent Gravimetric Analyzer (IGA). About 25 mg sample was added to the chamber and outgassed until reaching to a constant weight at 250 °C. Then the flowrate of ethanol or acetonitrile vapor was introduced. The adsorption kinetics curve was recorded at a pressure of 5 mbar, 40 °C. The desorption kinetics curve was recorded from a pressure of 2 mbar, 40 °C. Thermogravimetric analysis (TG) was performed on a TA SDTQ600 analyzer. Measurements were performed in the temperature range of 25-800 °C with a temperature-programmed rate of 10 °C/min in continuous flow of synthetic air (100 mL/min).

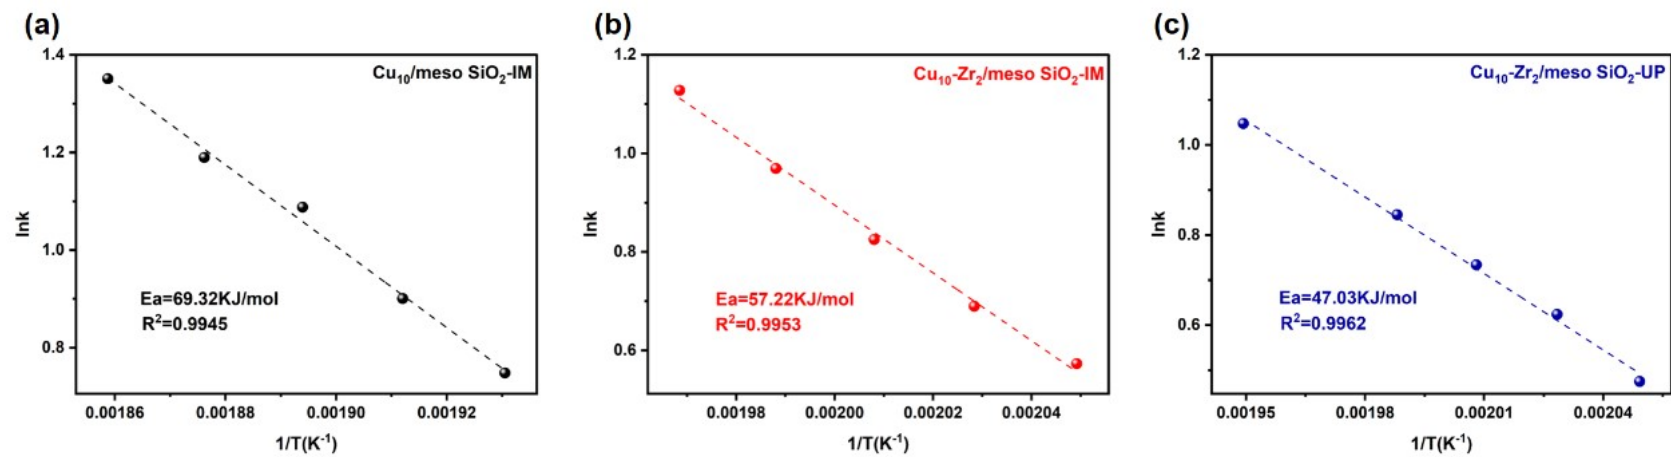

**Figure S1.** Arrhenius plots for the conversion of ethanol over catalysts. Reaction conditions:  $p = 0.1$  MPa, ethanol WHSV =  $7 \text{ h}^{-1}$ ,  $\text{NH}_3/\text{ethanol}$  molar ratio = 3.

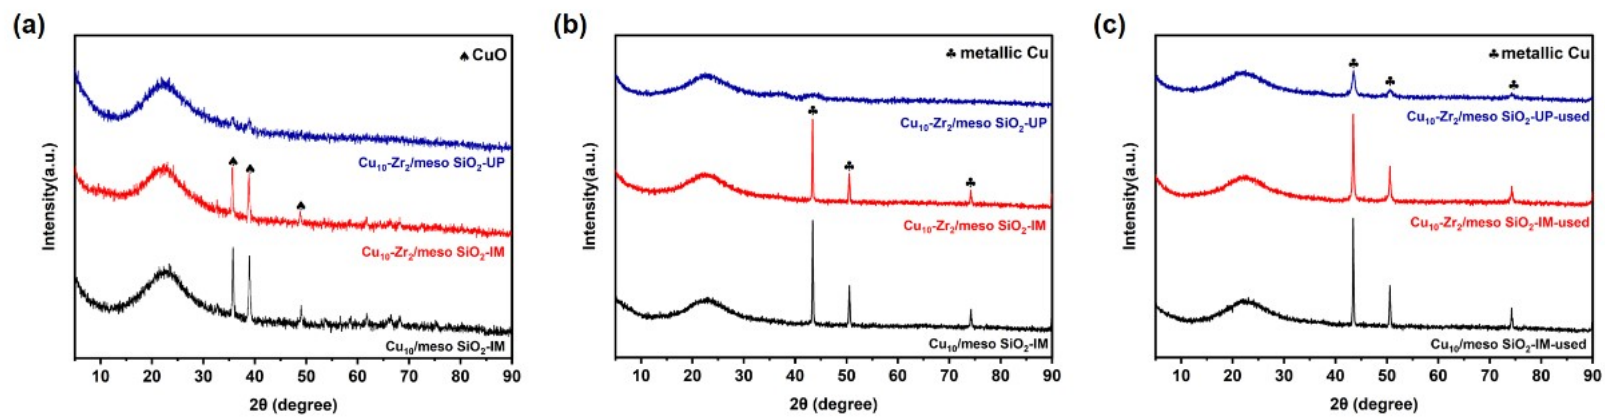

**Figure S2.** XRD patterns of the (a) calcined (b) reduced and (c) spent catalysts.

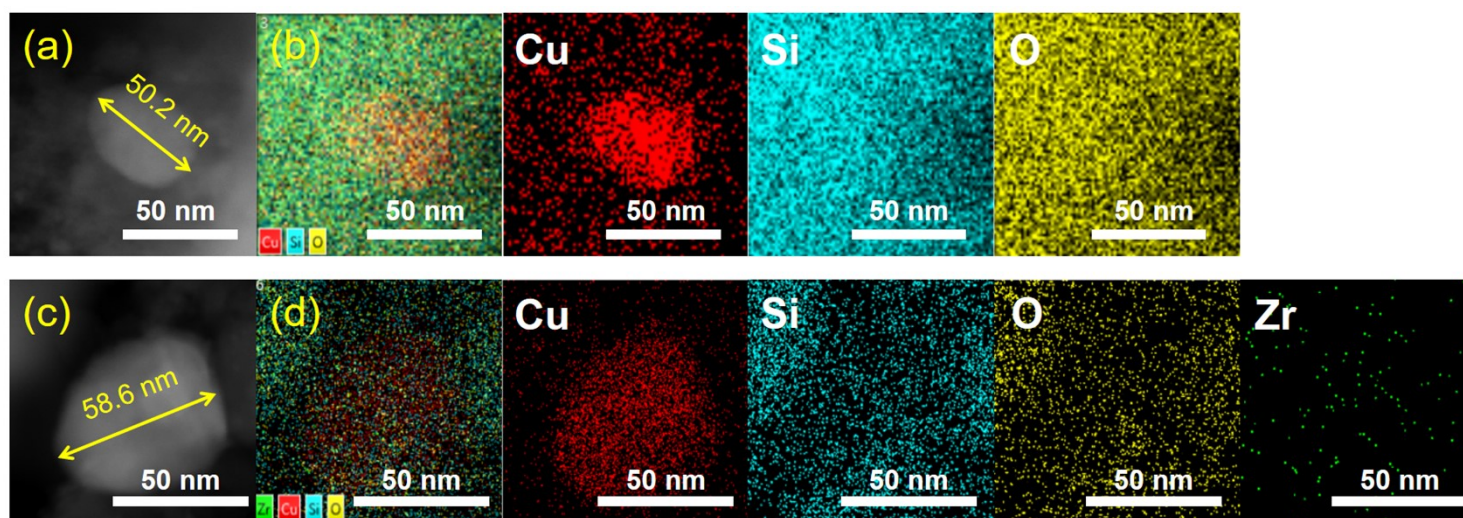

**Figure S3.** HAADF-STEM images and corresponding elemental mappings of  $\text{Cu}_{10}/\text{meso SiO}_2\text{-IM}$  (a,b) and  $\text{Cu}_{10}\text{-Zr}_2/\text{meso SiO}_2\text{-IM}$  (c,d).

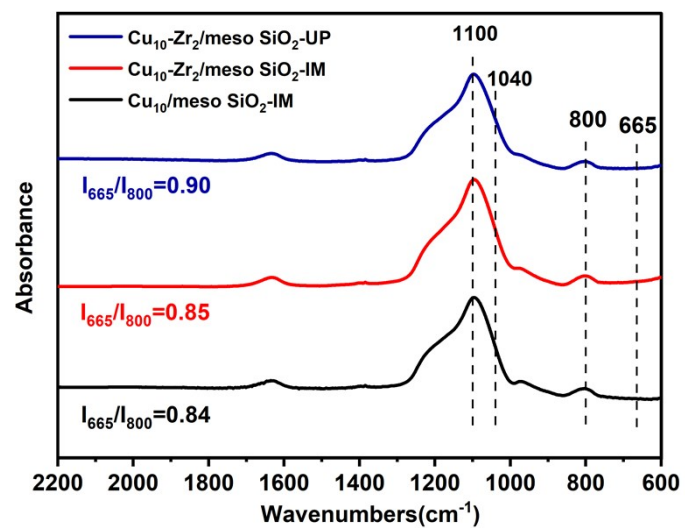

**Figure S4.** FTIR spectra of the as-calcined catalysts. The  $I_{665}/I_{800}$  intensity ratio represents the relative amount of copper phyllosilicate in the samples.



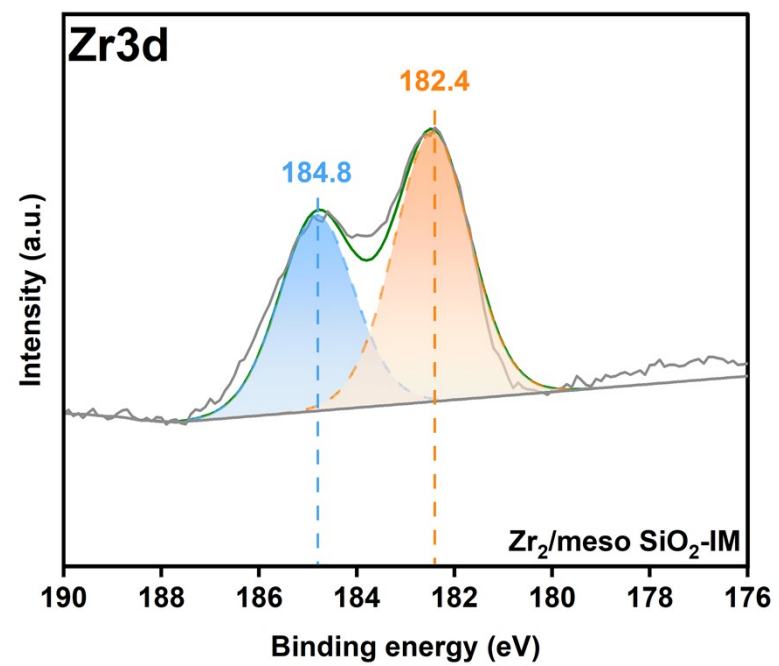

**Figure S5.** Zr 3d XPS spectrum of reduced  $\text{Zr}_2/\text{meso SiO}_2\text{-IM}$ .

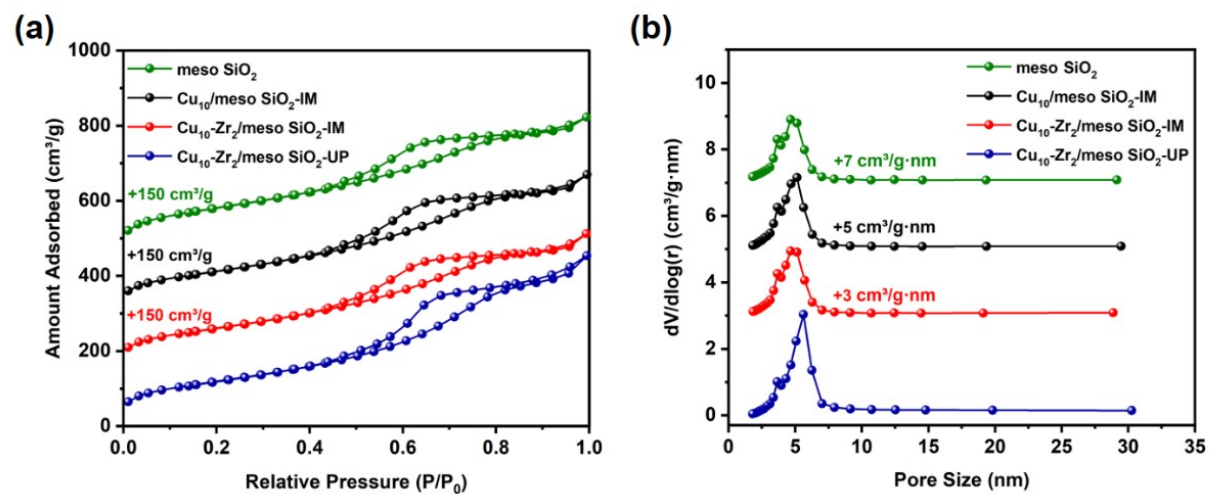

**Figure S6.** (a) N<sub>2</sub> adsorption-desorption isotherms and (b) pore size distribution of samples.

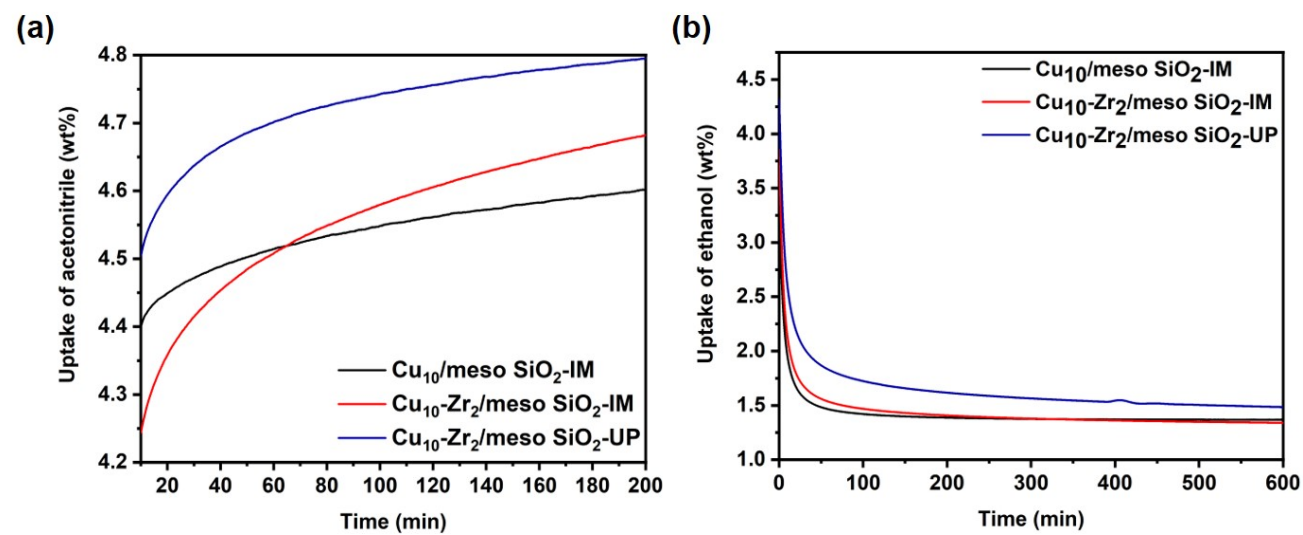

**Figure S7.** IGA curves of acetonitrile adsorption (a) and ethanol desorption (b) over catalysts.

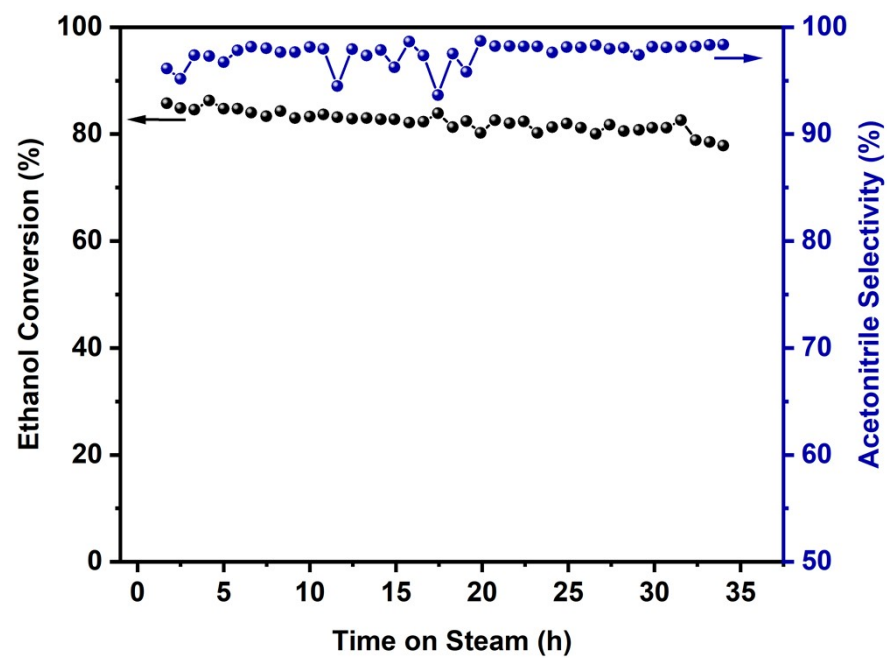

**Figure S8.** Ethanol conversion and acetonitrile selectivity variation with time-on-stream over regenerated  $\text{Cu}_{10}\text{-Zr}_2/\text{meso-SiO}_2\text{-UP}$ . (Reaction conditions:  $p = 0.1$

MPa,  $T = 265\text{ }^\circ\text{C}$ , ethanol WHSV =  $0.8\text{ h}^{-1}$ ,  $\text{NH}_3/\text{ethanol}$  molar ratio = 9.)

**Table S1.** Performance and characteristics of the synthetic routes for acetonitrile production

| Synthetic routes                                  |                                | Feedstock                                         | Reaction temperature | Conversion (%) | Selectivity (%) or productivity | Characteristics                                                                                                                                                                               | AE <sup>a</sup> | E-factor <sup>b</sup> | Ref.             |
|---------------------------------------------------|--------------------------------|---------------------------------------------------|----------------------|----------------|---------------------------------|-----------------------------------------------------------------------------------------------------------------------------------------------------------------------------------------------|-----------------|-----------------------|------------------|
| Commercial propylene ammoxidation (SOHIO) process |                                | Propylene, NH <sub>3</sub> , O <sub>2</sub>       | 470-480 °C           | 95             | 2-4, as by-product              | Complex and toxic by-products (HCN, propionitrile, acrolein, acetone, acetaldehyde, allyl alcohol, oxazole, benzonitrile, etc.); energy-intensive separation process; productivity constraint | 38.3%           | 25.02                 | <sup>4</sup>     |
| C1 substrates                                     | Carbon monoxide hydroamination | Carbon monoxide, NH <sub>3</sub> , H <sub>2</sub> | 475 °C               | 47             | 96                              | Poor activity, unmentioned catalyst stability                                                                                                                                                 | 53.3%           | 0.99                  | <sup>5</sup>     |
|                                                   | Methane amination              | Methane, NH <sub>3</sub>                          | 700 °C               | 3.5            | 372.4 μmol/g <sub>Ga</sub> /min | High reaction temperature, inferior catalyst stability, toxic by-product of HCN, co-production of H <sub>2</sub>                                                                              | 83.7%           | 1.91                  | <sup>6</sup>     |
|                                                   | Methanol amination             | Methanol, NH <sub>3</sub>                         | 525 °C               | 98             | 63                              | Insufficient catalytic lifetime (<60 hours), renewable catalyst, toxic by-product of HCN, co-production of H <sub>2</sub>                                                                     | 50.6%           | 2.14                  | <sup>7</sup>     |
| C2 substrates                                     | Ethylene dehydroamination      | Ethylene, NH <sub>3</sub>                         | 500 °C               | 20             | 80                              | Poor activity, inferior catalyst stability, toxic by-product of HCN, co-production of H <sub>2</sub>                                                                                          | 91.1%           | 1.04                  | <sup>8</sup>     |
|                                                   | Ethylene ammoxidation          | Ethylene, NH <sub>3</sub> , O <sub>2</sub>        | 500 °C               | 15-26          | 95-97                           | Poor activity, unmentioned catalyst stability                                                                                                                                                 | 44.1%           | 1.72                  | <sup>9, 10</sup> |
|                                                   | Ethane dehydroamination        | Ethane, NH <sub>3</sub>                           | 500 °C               | 15-20          | 20-68                           | Poor activity, inferior catalyst stability, toxic by-product of HCN, co-production of H <sub>2</sub>                                                                                          | 87.2%           | 1.02                  | <sup>8, 11</sup> |
|                                                   | Ethane ammoxidation            | Ethane, NH <sub>3</sub> , O <sub>2</sub>          | 400-450 °C           | 10-48          | 25-90                           | Poor reactivity, unmentioned catalyst stability                                                                                                                                               | 43.1%           | 1.71                  | <sup>12-19</sup> |

|                                             |                                           |                  |                       |                       |                                                                                                                            |       |                        |       |
|---------------------------------------------|-------------------------------------------|------------------|-----------------------|-----------------------|----------------------------------------------------------------------------------------------------------------------------|-------|------------------------|-------|
| Acetic acid amination                       | Acetic acid, NH <sub>3</sub>              | 360-390 °C       | 88-99                 | 62-99                 | High activity, high corrosiveness on equipment, inferior catalyst stability                                                | 53.3% | 0.96                   | 20    |
| Ethylamine aerobic dehydrogenation          | Ethylamine, O <sub>2</sub>                | 225 °C           | 99                    | 80                    | Costly feedstock, inferior catalyst stability                                                                              | 44.1% | 1.45                   | 21    |
| Ethylamine electrocatalytic dehydrogenation | Ethylamine                                | Room temperature | -                     | 55-99                 | Costly feedstock, high Faraday efficiency, low production capacity, inferior cycling stability                             | 91.1% | -                      | 22-25 |
| Ethanol ammoxidation                        | Ethanol, NH <sub>3</sub> , O <sub>2</sub> | 350-450 °C       | 80-99                 | 45-95                 | High activity, renewable substrate, inferior catalyst stability                                                            | 36.9% | 1.46                   | 26-31 |
| Ethanol dehydroamination                    | Ethanol, NH <sub>3</sub>                  | 230-450 °C       | 91-99/(96, this work) | 69-98/(96, this work) | High activity, renewable substrate, co-production of H <sub>2</sub> , insufficient catalytic lifetime (<hundreds of hours) | 65.1% | 0.57/(0.60, this work) | 32-45 |

<sup>a</sup> Atom economy, defined as the molecular weight ratio of the target product to the sum of all reactants. <sup>b</sup> Environmental factor, defined as mass ratio of total waste to target product. Calculation based on optimal reaction performance.

**Table S2.** Results of catalytic dehydroamination of ethanol over copper-based catalysts

| Catalyst                                                                                             | Reaction Condition                                                                                                                      | Acetonitrile<br>yield (%) | Ref.            |
|------------------------------------------------------------------------------------------------------|-----------------------------------------------------------------------------------------------------------------------------------------|---------------------------|-----------------|
| Cu <sub>10</sub> -Zr <sub>2</sub> /meso SiO <sub>2</sub> -UP<br>15%Cu/Al <sub>2</sub> O <sub>3</sub> | 265 °C, 0.1 MPa, n(NH <sub>3</sub> ):n(alcohol)=9:1, LHSV=0.8 h <sup>-1</sup>                                                           | 95                        | This work<br>32 |
|                                                                                                      | 325 °C, 0.1 MPa, Cu/Al <sub>2</sub> O <sub>3</sub> (3 mL), V <sub>(alcohol)</sub> =0.1<br>mmol/min, n(NH <sub>3</sub> ):n(alcohol)=20:1 | 87                        |                 |
| Cu/γ-Al <sub>2</sub> O <sub>3</sub>                                                                  | 290 °C, 0.1 MPa, n(NH <sub>3</sub> ):n(alcohol)=7:1, WHSV=1.0 h <sup>-1</sup>                                                           | 92                        | 33              |
| 15%Cu/Na-ZSM-23                                                                                      | 350 °C, 0.1 MPa, n(NH <sub>3</sub> ):n(alcohol)=5:1, WHSV=1.0 h <sup>-1</sup>                                                           | 63                        | 34              |
| CuZnAlTiLaO <sub>x</sub>                                                                             | 315 °C, 0.1 MPa, n(NH <sub>3</sub> ):n(alcohol)=5:1, WHSV=2.5 h <sup>-1</sup>                                                           | 98                        | 43              |
| Cu-ZnO-La <sub>2</sub> O <sub>3</sub> -Al <sub>2</sub> O <sub>3</sub>                                | 280-290 °C, 0.1 MPa, n(NH <sub>3</sub> ):n(alcohol)=4-5:1,<br>LHSV=0.25 h <sup>-1</sup>                                                 | 96                        | 44              |
| CuO-ZnO-ZrO <sub>2</sub> /mCaO·nAl <sub>2</sub> O <sub>3</sub>                                       | 280 °C, 0.1 MPa, n(NH <sub>3</sub> ):n(H <sub>2</sub> ):n(alcohol)=5:1.15:1,<br>WHSV=1.14 h <sup>-1</sup>                               | 96                        | 45              |

**Table S3.** Cu particle sizes of the reduced and spent catalysts <sup>a</sup>

| Catalyst                                                     | Before reaction (nm) | After reaction (nm) |
|--------------------------------------------------------------|----------------------|---------------------|
| Cu <sub>10</sub> /meso SiO <sub>2</sub> -IM                  | 46.0                 | 49.4                |
| Cu <sub>10</sub> -Zr <sub>2</sub> /meso SiO <sub>2</sub> -IM | 43.7                 | 45.5                |
| Cu <sub>10</sub> -Zr <sub>2</sub> /meso SiO <sub>2</sub> -UP | --                   | 16.7                |

<sup>a</sup> Calculated by the Scherrer equation at  $2\theta = 43.4^\circ$ .



**Table S4.** Textural properties of the catalysts

| Catalyst                                                     | $S_{\text{BET}}(\text{m}^2/\text{g})^{\text{a}}$ | $V_{\text{micro}}(\text{cm}^3/\text{g})^{\text{b}}$ | $V_{\text{meso}}(\text{cm}^3/\text{g})^{\text{c}}$ | Pore size (nm) <sup>d</sup> |
|--------------------------------------------------------------|--------------------------------------------------|-----------------------------------------------------|----------------------------------------------------|-----------------------------|
| Cu <sub>10</sub> /meso SiO <sub>2</sub> -IM                  | 413.6                                            | 0                                                   | 0.55                                               | 4.5                         |
| Cu <sub>10</sub> -Zr <sub>2</sub> /meso SiO <sub>2</sub> -IM | 408.2                                            | 0                                                   | 0.58                                               | 4.9                         |
| Cu <sub>10</sub> -Zr <sub>2</sub> /meso SiO <sub>2</sub> -UP | 432.9                                            | 0                                                   | 0.71                                               | 5.7                         |
| meso SiO <sub>2</sub>                                        | 475.6                                            | 0                                                   | 0.56                                               | 4.6                         |

<sup>a</sup> BET surface area. <sup>b</sup> t-Plot micropore volume. <sup>c</sup> BJH adsorption volume. <sup>d</sup> BJH mesopore size distribution based on the adsorption branch.

**Table S5.** Chemical composition of the spent catalysts <sup>a</sup>

| Catalyst                                                     | CuO (%) | ZrO <sub>2</sub> (%) |
|--------------------------------------------------------------|---------|----------------------|
| Cu <sub>10</sub> /meso SiO <sub>2</sub> -IM                  | 6.1     | -                    |
| Cu <sub>10</sub> -Zr <sub>2</sub> /meso SiO <sub>2</sub> -IM | 10.2    | 2.1                  |
| Cu <sub>10</sub> -Zr <sub>2</sub> /meso SiO <sub>2</sub> -UP | 10.3    | 2.3                  |

<sup>a</sup> Obtained from the ICP analysis.

1. G. C. Chinchin, C. M. Hay, H. D. Vandervell and K. C. Waugh, *J. Catal.* , 1987, **103**, 79-86.
2. J. Gong, H. Yue, Y. Zhao, S. Zhao, L. Zhao, J. Lv, S. Wang and X. Ma, *J. Am. Chem. Soc.* , 2012, **134**, 13922-13925.
3. C. A. Emeis, *J. Catal.* , 1993, **141**, 347-354.
4. K. Trangwachirachai and Y.-C. Lin, *Dalton Trans.* , 2023, **52**, 6211-6225.
5. K. Kim, *J. Catal.* , 1992, **137**, 127-138.
6. K. Trangwachirachai, C.-H. Chen and Y.-C. Lin, *Molecular Catalysis*, 2021, **516**, 111961-111971.
7. D.-C. Kang, E.-J. Kim, D.-P. Kim and C.-H. Shin, *Appl. Catal., A* 2022, **641**, 118688-118698.
8. G. Chen, S. Fadaeerayeni, L. Fang, E. Sarnello, T. Li, H. Toghiani and Y. Xiang, *Catal. Today* 2023, **416**, 113751-113759.
9. F. Ayari, M. Mhamdi, D. P. Debecker, E. M. Gaigneaux, J. Alvarez-Rodriguez, A. Guerrero-Ruiz, G. Delahay and A. Ghorbel, *J. Mol. Catal. A: Chem.* , 2011, **339**, 8-16.
10. B. Rhimi, M. Mhamdi, V. N. Kalevaru and A. Martin, *RSC Adv.*, 2016, **6**, 65866-65878.
11. G. Chen, T. Liang, P. Yoo, S. Fadaeerayeni, E. Sarnello, T. Li, P. Liao and Y. Xiang, *ACS Catal.*, 2021, **11**, 7987-7995.
12. E. Rojas, M. O. Guerrero-Pérez and M. A. Bañares, *Catal. Commun.* , 2009, **10**, 1555-1557.
13. Y. Li and J. N. Armor, *J. Catal.* , 1998, **173**, 511-518.
14. S. Essid, F. Ayari, R. Bulánek, J. Vaculík, M. Mhamdi, G. Delahay and A. Ghorbel, *Solid State Sci.* , 2019, **93**, 13-23.
15. X. Liu, T. Liang, R. Barbosa, G. Chen, H. Toghiani and Y. Xiang, *ACS Omega*, 2020, **5**, 1669-1678.
16. M. O. Guerrero-Pérez, E. Rojas-García, R. López-Medina and M. A. Bañares, *Catal. Lett.* , 2016, **146**, 1838-1847.
17. F. Rubio - Marcos, E. Rojas, R. López - Medina, M. O. Guerrero - Pérez, M. A. Bañares and J. F. Fernandez, *ChemCatChem*, 2011, **3**, 1637-1645.
18. R. Catani and G. Centi, *J. Chem. Soc., Chem. Commun.* , 1991, **16**, 1081-1083.
19. Y. Liu, T. Li, S. Qiao, Z. Heng, T. Zhao, H. Wu, T. Xiong, J. Li, X. Yao, L. Long, Y. Xiang, Q. Liu, L. Lu, T. Liang, J. Chen and F. Jin, *ACS Appl. Mater. Interfaces*, 2023, **15**, 25604-25614.
20. S. I. Galanov, O. I. Sidorova and M. A. Gavrilenko, *Procedia Chemistry*, 2014, **10**, 108-113.
21. E. C. Corker, U. V. Mentzel, J. Mielby, A. Riisager and R. Fehrmann, *Green Chem.* , 2013, **15**, 928-933.
22. D. Wu, J. Li, L. Yao, R. Xie and Z. Peng, *ACS Appl. Mater. Interfaces*, 2021, **13**, 55292-55298.
23. W. Ao, H. Ren, C. Cheng, Z. Fan, Q. Qin, P. Yin, Q. Zhang and L. Dai, *Angew. Chem. Int. Ed.* , 2023, **62**, e202307924.
24. J. Li, J. Tang, D. Wu, L. Yao and Z. Peng, *Int. J. Hydrogen Energy* 2023, **48**, 36286-36294.
25. Y. Zhu, D. Wu, J. Tang, D. Braaten, B. Liu and Z. Peng, *Chem. Commun.* , 2024, **60**, 9007-9021.

26. B. M. Reddy and B. Manohar, *J. Chem. Soc., Chem. Commun.* , 1993, **3**, 234-235.
27. S. J. Kulkarni, R. R. Rao, M. Subrahmanyam and A. V. R. Rao, *J. Chem. Soc., Chem. Commun.* , 1994, **3**, 273.
28. C. Hamill, H. Driss, A. Goguet, R. Burch, L. Petrov, M. Daous and D. Rooney, *Appl. Catal., A* 2015, **506**, 261-267.
29. R. R. Rao, N. Srinivas, S. J. Kulkarni, M. Subrahmanyam and K. V. Raghavan, *Indian. J. Chem. A*, 1997, **36**, 708-711.
30. F. Folco, J. V. Ochoa, F. Cavani, L. Ott and M. Janssen, *Catal. Sci. Technol.*, 2017, **7**, 200-212.
31. T. Tabanelli, M. Mari, F. Folco, F. Tanganelli, F. Puzzo, L. Setti and F. Cavani, *Appl. Catal., A* 2021, **619**, 118139-118150.
32. R. J. Card and J. L. Schmitt, *J. Org. Chem.* , 1981, **46**, 754-757.
33. Y. Hu, J. Cao, J. Deng, B. Cui, M. Tan, J. Li and H. Zhang, *React. Kinet. Mech. Cat.*, 2012, **106**, 127-139.
34. J. Deng, H. S. Zhang, Y. F. Hu, Y. Liu and D. D. Wang, *Adv.Mater. Res.*, 2013, **750-752**, 1700-1703.
35. Y.-S. Jeong, S. H. An and C.-H. Shin, *Korean J. Chem. Eng.* , 2019, **36**, 1051-1056.
36. *Europe Pat.*, EP0206632, 1986.
37. H. Abe and A. T. Bell, *J. Catal.* , 1993, **142**, 430-436.
38. Y. Zhang, Y. Zhang, C. Feng, C. Qiu, Y. Wen and J. Zhao, *Catal. Commun.* , 2009, **10**, 1454-1458.
39. C. Feng, Y. Zhang, Y. Zhang, Y. Wen and J. Zhao, *Catal. Lett.* , 2010, **141**, 168-177.
40. D. Zhang, Y. Zhang, Y. Wen, K. Hou and J. Zhao, *Chem. Eng. Res. Des.* , 2011, **89**, 2147-2152.
41. L. Mei, C. Feng, Y. Wang, Q. Yu, W. Xin, W. Chu, Y. Wang, X. Zhu, S. Liu, H. Wang and L. Xu, *Ind. Eng. Chem. Res.* , 2023, **62**, 14234-14243.
42. X. Li, C. Feng, W. F. Chu, Y. P. Xie, S. L. Liu and X. X. Zhu, *Low-Carbon Chemistry and Chemical Engineering*, 2024, **49**, 28-35.
43. *China Pat.*, CN1062303, 1992.
44. Z. G. Jiang, Y. H. Shan, Y. S. Zhou, Y. Y. Zhang and M. S. Li, *Journal of Changzhou University (Natural Science Edition)*, 2010, **22**, 19-23.
45. V. V. Belov, V. I. Markov, S. B. Sova, E. Z. Golosman and A. I. Nechugovskii, *Russ. J. Appl. Chem.* , 2016, **89**, 414-420.
